# Supplementary material for: Evaluation of contact time and fiber morphology on bacterial immobilization for development of novel surfactant degrading nanofibrous webs
Source: Royal Society of Chemistry journal article supplement (doi:10.1039/c5ra20739h), 2015-01-01
Supplement: c5ra20739h1.pdf [file c5ra20739h1.pdf]

## Supplementary data

### **Evaluation of contact time and fiber morphology on bacterial immobilization for development of novel surfactant degrading nanofibrous webs**

**Omer Faruk Sarioglu<sup>a</sup>, Asli Celebioglu<sup>b</sup>, Turgay Tekinay<sup>c,d,\*</sup>, Tamer Uyar<sup>a,b,\*</sup>**

<sup>a</sup>Institute of Materials Science & Nanotechnology, Bilkent University, 06800, Bilkent, Ankara, Turkey

<sup>b</sup>UNAM-National Nanotechnology Research Center, Bilkent University, Ankara 06800, Turkey

<sup>c</sup>Gazi University, Department of Medical Biology and Genetics, Faculty of Medicine, 06500, Besevler, Ankara, Turkey

<sup>d</sup>Gazi University, Life Sciences Application and Research Center, 06830, Golbasi, Ankara, Turkey

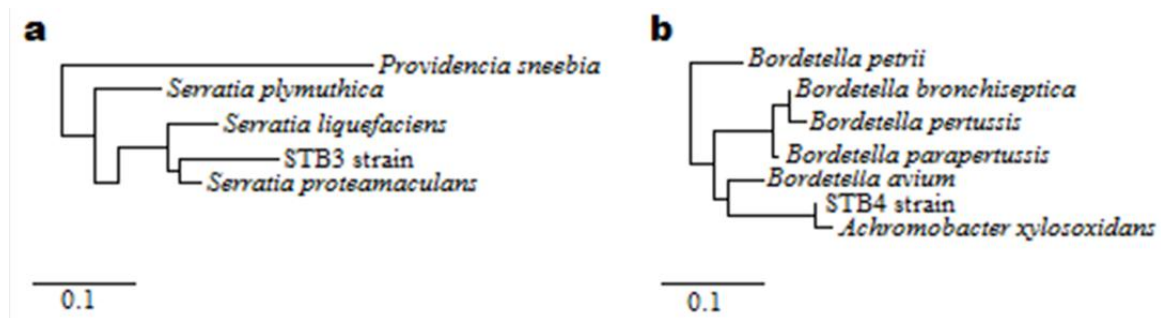

**Supplementary Figure 1.** Phylogenetic trees of (a) STB3 and (b) STB4 strains according to 16S rRNA gene sequencing analysis.

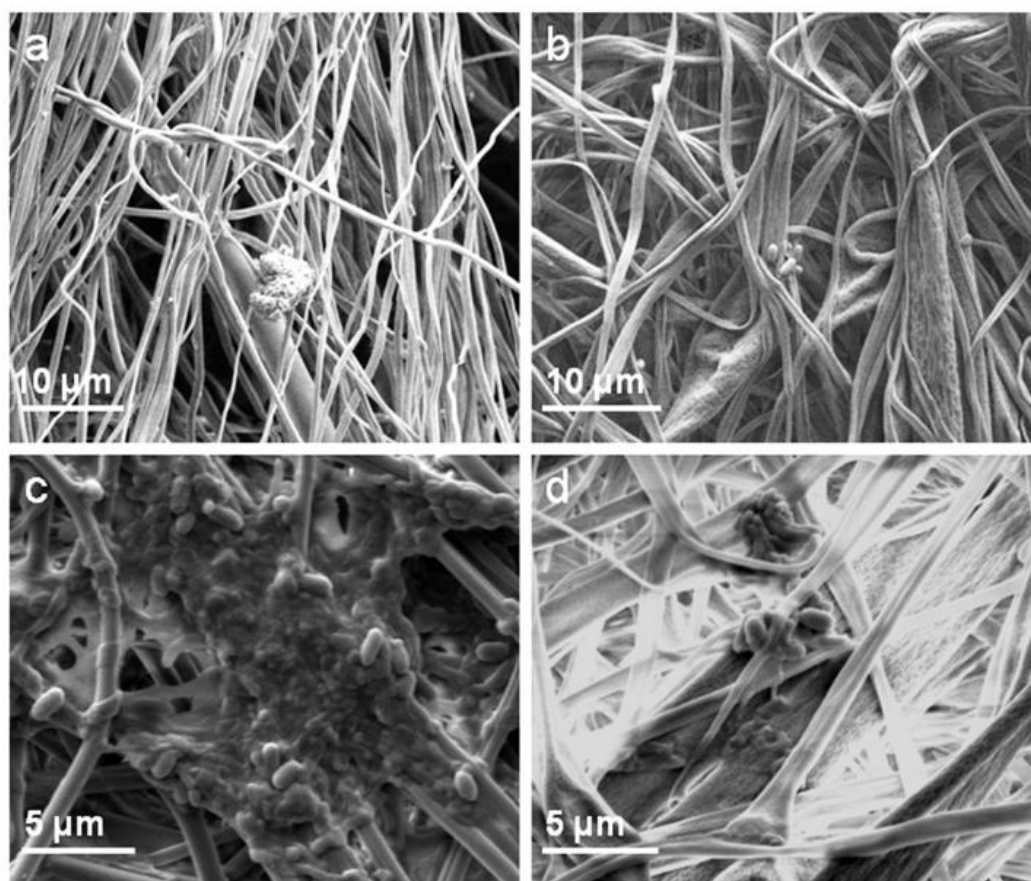

**Supplementary Figure 2.** SEM micrographs of (a-c) nCA and (b-d) pCA nanofibers showing immobilization of STB3 cells onto (a) nCA nanofibers and (b) pCA nanofibers; and immobilization of STB4 cells onto (c) nCA nanofibers and (d) pCA nanofibers after 7 days of incubation.

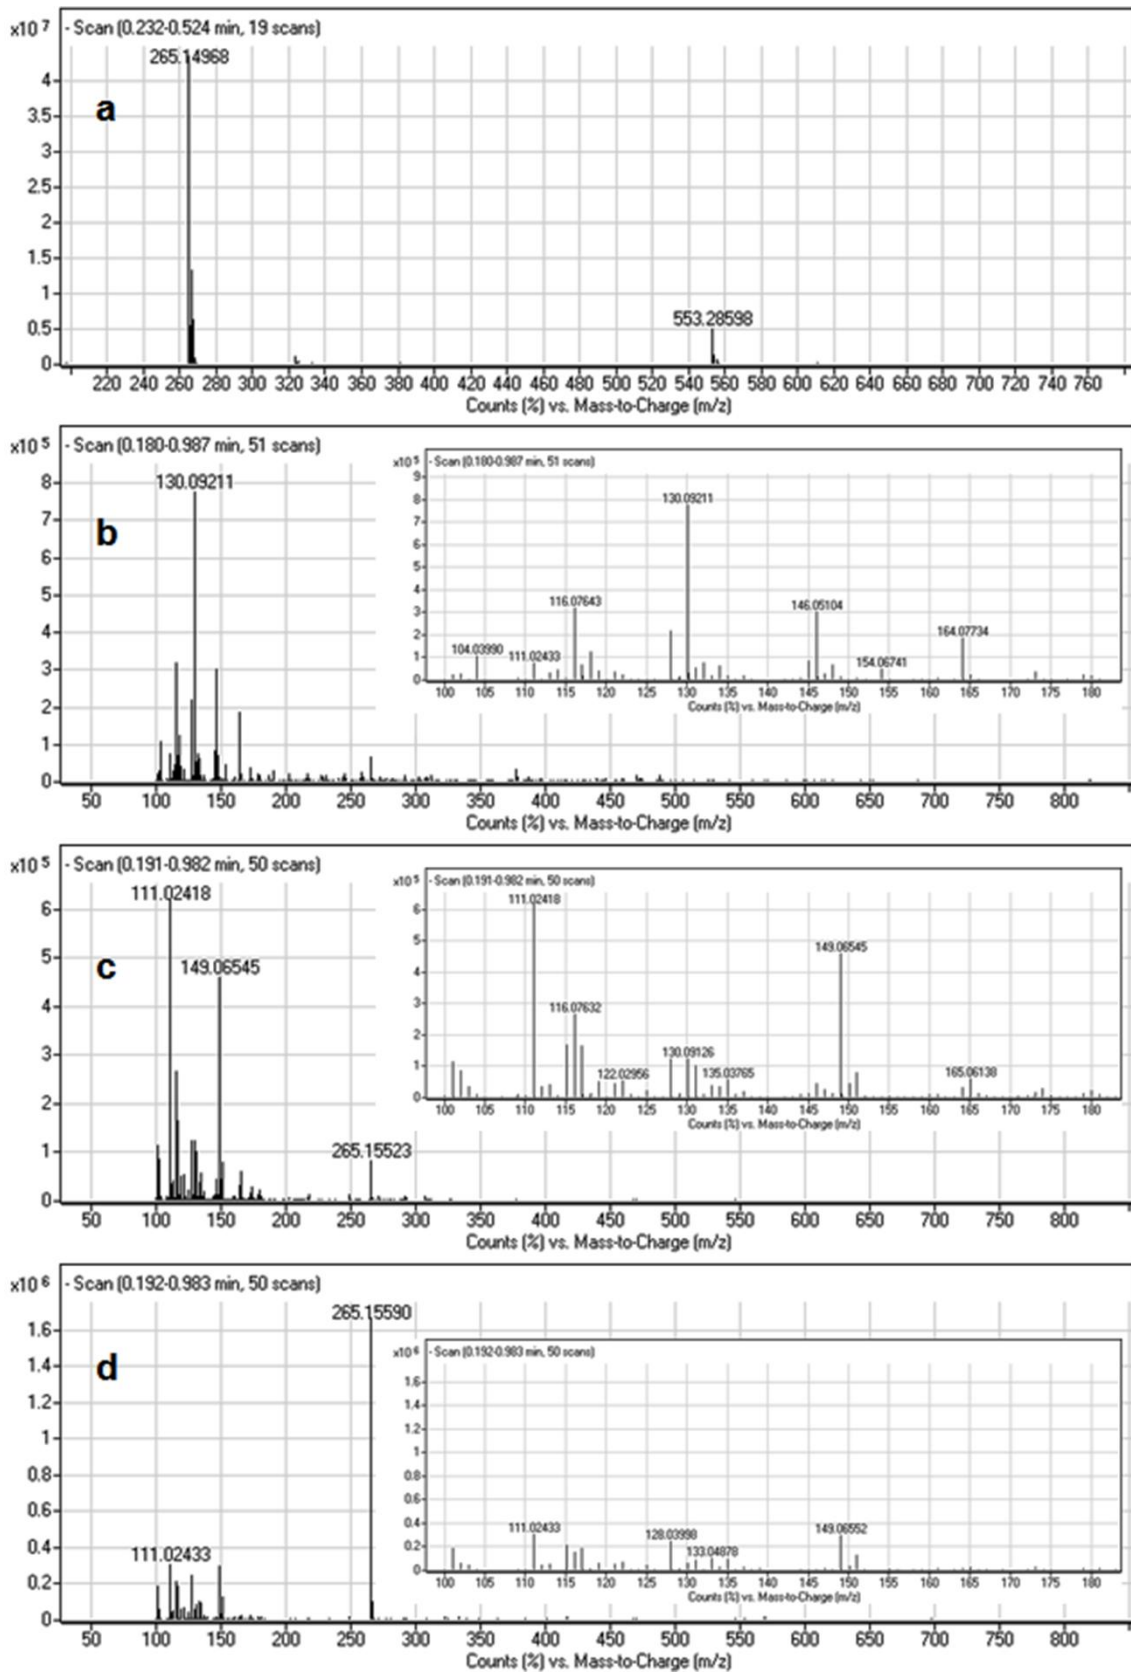

**Supplementary Figure 3.** LC-MS spectra of (a) SDS solution in water at 100 mg/L (b) nutrient broth in water (c) STB3 sample having 100 mg/L initial SDS after incubation and suspension of bacterial cells (d) STB4 sample having 100 mg/L initial SDS after incubation and suspension of bacterial cells.

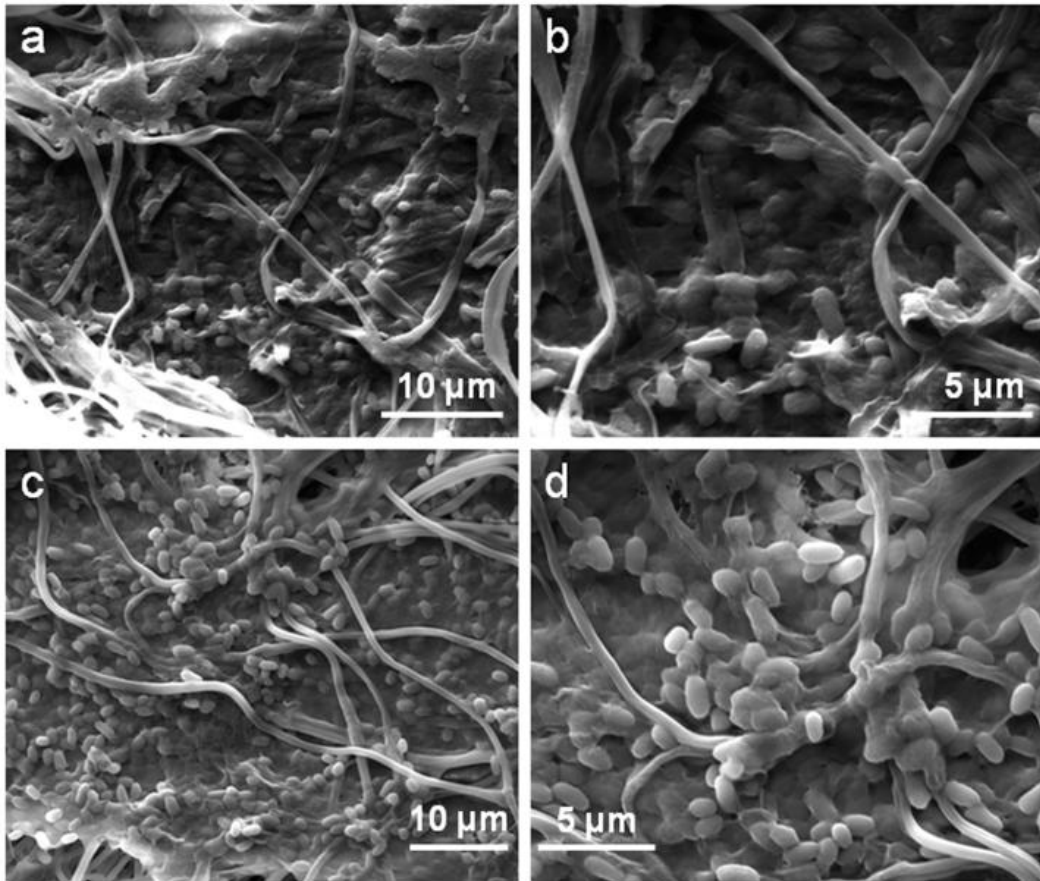

**Supplementary Figure 4.** SEM micrographs of (a-b) STB3 immobilized pCA webs and (c-d) STB4 immobilized pCA webs after the reusability test, showing strong bacterial attachments.

**Supplementary Table 1.** Adsorption kinetics coefficients of STB3/pCA and STB4/pCA webs for each isotherm model.

| <b>Samples</b> | <b>Isotherm</b> | <b>Parameters</b> | <b>Values</b> | <b>Ry<sup>2</sup> value</b> |
|----------------|-----------------|-------------------|---------------|-----------------------------|
| STB3/pCA       | Freundlich      | Kf                | 184.98        | 0.991                       |
|                |                 | 1/n               | 0.555         |                             |
|                | Langmuir        | Q <sub>max</sub>  | 3367          | 0.992                       |
|                |                 | b                 | 0.057         |                             |
|                | Toth            | Q <sub>max</sub>  | 3023          | 0.992                       |
|                |                 |                   | b             |                             |
| n              |                 | 4.9               |               |                             |
| STB4/pCA       | Freundlich      | Kf                | 76.78         | 1.000                       |
|                |                 | 1/n               | 0.48          |                             |
|                | Langmuir        | Q <sub>max</sub>  | 1464          | 1.000                       |
|                |                 | b                 | 0.032         |                             |
|                | Toth            | Q <sub>max</sub>  | 1350          | 1.000                       |
|                |                 |                   | b             |                             |
| n              |                 | 4.58              |               |                             |

**Supplementary Table 2.** The R<sup>2</sup> values of zero, first, second and third order plots for the removal of SDS by STB3/pCA and STB4/pCA webs.

| <b>Samples</b> | <b>Model</b> | <b>R<sup>2</sup> values</b> |
|----------------|--------------|-----------------------------|
| STB3/pCA       | zero order   | 0.9319                      |
|                | first order  | 0.8583                      |
|                | second order | 0.6515                      |
|                | third order  | 0.6246                      |
| STB4/pCA       | zero order   | 0.8531                      |
|                | first order  | 0.7414                      |
|                | second order | 0.6434                      |
|                | third order  | 0.6249                      |
